# Supplementary material for: Printable Zinc-Ion Hybrid Micro-Capacitors for Flexible Self-Powered Integrated Units
Source: Nanomicro Lett. 2020 Nov 5;13:19. doi: 10.1007/s40820-020-00546-7 (PMC8187672; doi:10.1007/s40820-020-00546-7)
Supplement: Supplementary file 1 — Supplementary file1 (PDF 1400 kb) [file 40820_2020_546_MOESM1_ESM.pdf]

Supporting Information for

## **Printable Zinc-Ion Hybrid Micro-Capacitors for Flexible Self-Powered Integrated Units**

Juan Zeng<sup>1</sup>, Liubing Dong<sup>2</sup>, Lulu Sun<sup>3</sup>, Wen Wang<sup>3</sup>, Yinhua Zhou<sup>3</sup>, Lu Wei<sup>1,\*</sup>, Xin Guo<sup>1,\*</sup>

<sup>1</sup>State Key Laboratory of Material Processing and Die & Mould Technology, School of Materials Science and Engineering, Huazhong University of Science and Technology, Wuhan 430074, People's Republic of China

<sup>2</sup>College of Chemistry and Materials Science, Jinan University, Guangzhou 511443, People's Republic of China

<sup>3</sup>Wuhan National Laboratory for Optoelectronics, School of Optical and Electronic Information, Huazhong University of Science and Technology, Wuhan 430074, People's Republic of China

\*Corresponding authors. E-mail: [lwei@hust.edu.cn](mailto:lwei@hust.edu.cn) (Lu Wei); [xguo@hust.edu.cn](mailto:xguo@hust.edu.cn) (Xin Guo)

## **S1 Experimental Section**

### **S1.1 Materials**

The polymer donor (PBDB-T-2F) and small molecule acceptor (IT-4F) were purchased from Organtecsolar Materials Inc. Zinc acetate dehydrate, ethanolamine and methoxyethanol were purchased from Sigma-Aldrich. The sol-gel ZnO solution was prepared by dissolving zinc acetate dihydrate (0.1 g) in methoxyethanol (1 mL) and ethanolamine (0.028 g).

### **S1.2 OSC fabrication**

The structure of the flexible OSC is PET/ITO/ZnO/PBDB-T-2F:IT-4F/MoO<sub>3</sub>/Ag. Isopropanol and acetone were used to clean the substrates. The electron transport layer ZnO was spun on the ITO/PET at 3500 rpm for 60 s and annealed at 130 °C for 15 min. Then, the PBDB-T-2F:IT-4F films were prepared on the top of ZnO by spin coating from a chlorobenzene solution (containing 0.5 vol% of 1,8-diiodooctane) with PBDB-T-2F:IT-4F (10 mg/mL: 10 mg/mL) at 1500 rpm for 60 s, and then annealed at 100 °C for 10 min in a glove box filled with nitrogen. Finally, MoO<sub>3</sub> (7 nm) and Ag (100 nm) were thermally evaporated on the active layer.

### **S1.3 Characterizations**

SEM (Nova NanoSEM 450, FEI Corporation, Netherlands) equipped with EDS and TEM (Tecnai G2 F30, FEI Corporation, Netherlands) were used to observe the micro-morphologies of samples and analyze the element compositions. The microstructure of kelp-carbon was characterized by Raman spectroscopy using a LabRAM HR800 spectrometer (HORIBA Jobin Yvon Corporation, France) with a Nd:YAG laser at a wavelength of 532 nm. XRD (X'Pert

PRO, PANalytical B.V., Netherlands) was used to analyze the crystal structure of materials and electrodes. The element composition of the kelp-carbon was identified by XPS collected on an AXIS Ultra DLD-600W spectrometer (Kratos Corporation, Japan) with a monochromatic Al K $\alpha$  X-ray source. N<sub>2</sub> adsorption/desorption measurements were carried out at 77 K using an ASAP 2020 surface area and porosity analyzer (Micromeritics Instrument Corporation, USA). Before testing, the samples were degassed at 350 °C overnight. CV tests were performed in the voltage range between 0.1 and 1.7 V at scan rates from 5 to 200 mV s<sup>-1</sup> using a Gamry Interface 1000 electrochemical workstation. EIS measurements were executed in the frequency range from 10<sup>-3</sup> to 10<sup>5</sup> Hz at open circuit potential with an AC amplitude of 5 mV. GCD tests were carried out on Arbin BT 2000 Battery Testing System in the voltage window of 0.1 to 1.7 V at current densities from 0.1 to 10 A g<sup>-1</sup>. The cycle stability tests were performed at 2 A g<sup>-1</sup>.

#### S1.4 Calculations

The specific capacity ( $C_m$ , mAh g<sup>-1</sup>) for the ZHCs can be calculated from discharge curve by Eq. (S1):

$$C_m = \frac{It}{m} \quad (S1)$$

where  $I$  (mA),  $t$  (h) represent the current and time of discharge process, and  $m$  (g) stands for the mass of cathode material.

Energy density ( $E$ , Wh kg<sup>-1</sup>) and power density ( $P$ , W kg<sup>-1</sup>) for the ZHCs were calculated by Eqs. (S2) and (S3), respectively:

$$E = C_m * U \quad (S2)$$

$$P = \frac{E}{t} \quad (S3)$$

where  $U$  (V) and  $t$  (h) stand for the discharge voltage after ohmic drop and discharge time.

The areal capacity ( $C_A$ , mAh cm<sup>-2</sup>) of the micro-ZHCs can be calculated from GCD curves via Eq. (S4):

$$C_A = \frac{It}{A} \quad (S4)$$

where  $I$  (mA) and  $t$  (h) represent the current and time of discharge process, and  $A$  (cm<sup>2</sup>) stand for the total area of cathode and anode.

The energy density  $E_A$  (mWh cm<sup>-2</sup>) and power density  $P_A$  (mW cm<sup>-2</sup>) were obtained from the Eqs. (S5) and (S6), respectively:

$$E_A = C_A * U \quad (S5)$$

$$P_A = \frac{E_A}{t} \quad (S6)$$

where  $U$  (V) and  $t$  (h) stand for the discharge voltage after ohmic drop and discharge time.

The overall efficiency of energy conversion and storage ( $\eta_{\text{overall}}$ ) can be calculated according to Eq. (S7):

$$\eta_{\text{overall}} = \frac{E}{P \times S \times t} \quad (\text{S7})$$

where  $E$ ,  $P$ ,  $S$ , and  $t$  are the discharge energy after solar-charging (Wh), the light intensity ( $\text{W m}^{-2}$ ), the effective area of solar cell ( $\text{m}^2$ ), and the duration of solar-charging (h), respectively.

## S2 Supplementary Figures and Tables

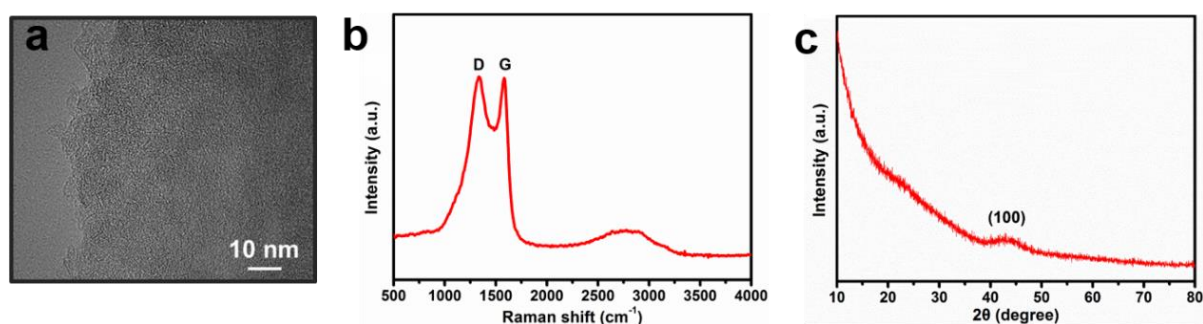

**Fig. S1** (a) TEM image, (b) Raman spectrum and (c) XRD pattern of the kelp-carbon

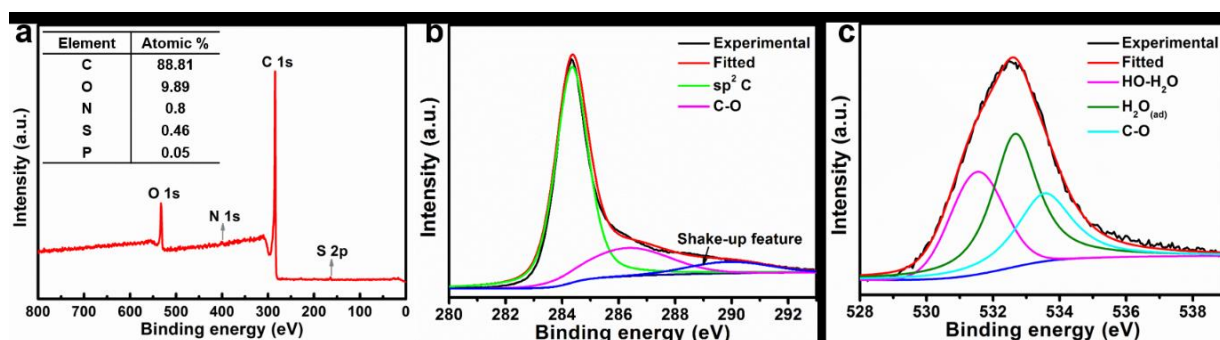

**Fig. S2** (a) XPS spectrum, (b) high-resolution C 1s and (c) high-resolution O 1s spectra of kelp-carbon

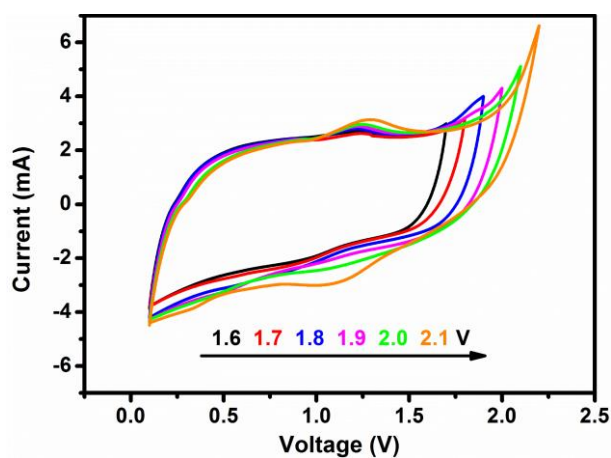

**Fig. S3** CV curves of the aqueous ZHC in operating voltage window from 1.6 to 2.1 V at a scan rate of  $10 \text{ mV s}^{-1}$

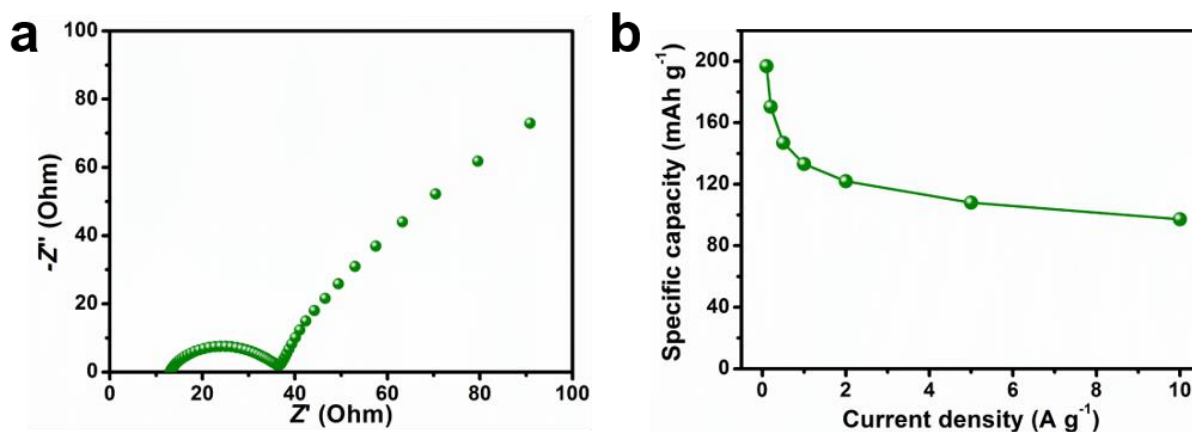

**Fig. S4** (a) Nyquist plot and (b) rate capability of the aqueous ZHC

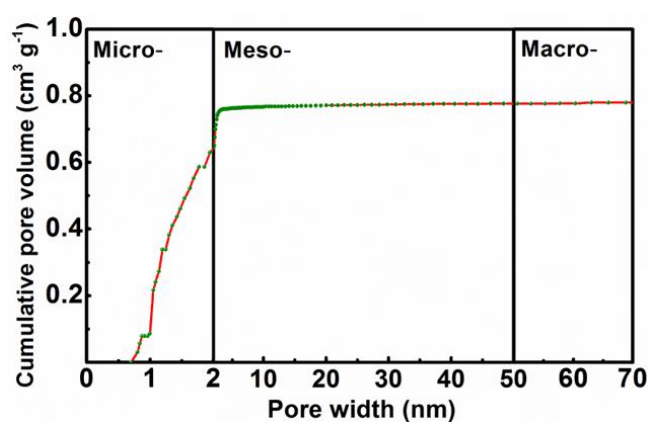

**Fig. S5** 2D-NLDFT pore size distribution curve for the commercial activated carbon (TF-B520)

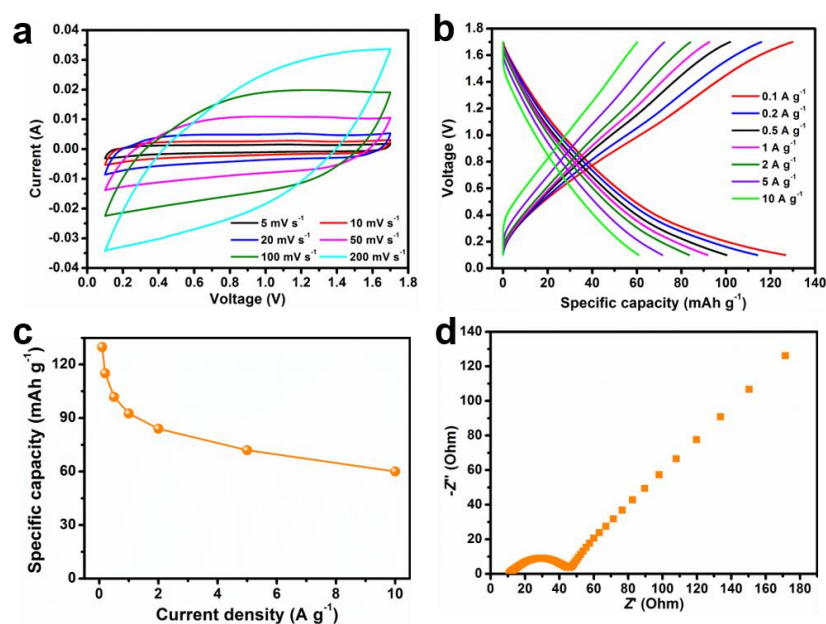

**Fig. S6** Electrochemical performances of the ZHC based on commercial activated carbon as cathode (TF-B520// $\text{Zn}(\text{CF}_3\text{SO}_3)_2$ //Zn foil): (a) CV curves at different scan rates, (b) GCD curves at different current densities, (c) rate capability and (d) Nyquist plot

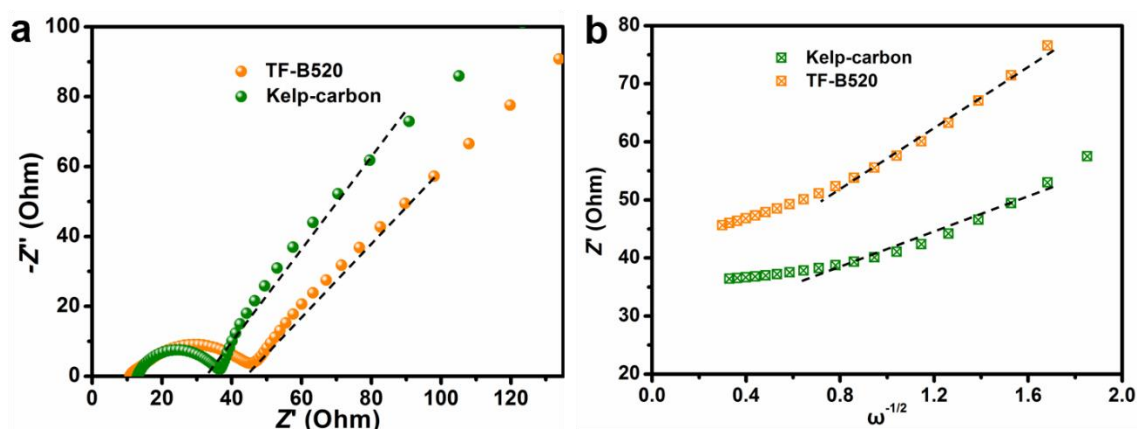

**Fig. S7** (a) Comparison of the Nyquist plots of aqueous ZHCs based on kelp-carbon cathode and TF-B520 cathode. Dashed lines highlighting the Warburg regions. (b) Plots of  $Z'$  versus  $\omega^{-1/2}$ . Dashed lines represent the linear fittings

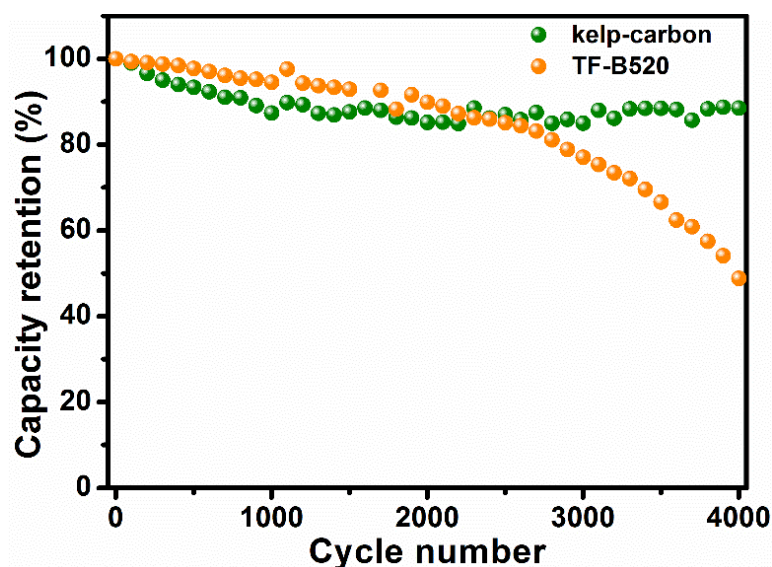

**Fig. S8** Comparison on the cycling stabilities of aqueous ZHCs based on kelp-carbon cathode and TF-B520 cathode at a current density of  $2 \text{ A g}^{-1}$  for 4,000 cycles

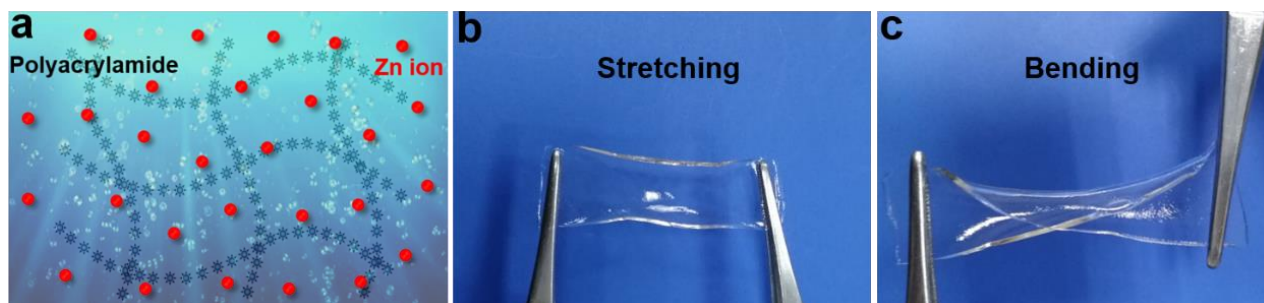

**Fig. S9** (a) Structural illustration, (b) and (c) optical images of the  $\text{Zn}(\text{CF}_3\text{SO}_3)_2$ -PAM hydrogel quasi-solid-state electrolyte

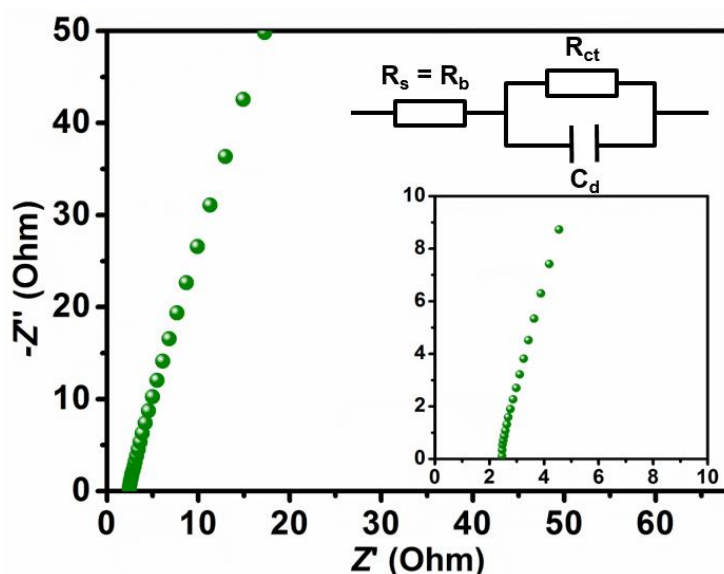

**Fig. S10** AC impedance spectrum for the  $\text{Zn}(\text{CF}_3\text{SO}_3)_2$ -PAM hydrogel electrolyte

The conductivity of the hydrogel electrolyte was evaluated by the electrochemical impedance spectroscopy using a Gamry Interface 1000 electrochemical workstation in the frequency range of  $10^{-3}$  to  $10^5$  Hz at an AC amplitude of 5 mV. In the measurement, the hydrogel electrolyte was sandwiched between two stainless steel sheets, and the conductivity  $\sigma$  ( $\text{mS cm}^{-1}$ ) was calculated by Eq. (S8),

$$\sigma = L/(R_b \times S) \times 1000 \quad (\text{S8})$$

where  $L$  (cm) is the distance between the two stainless steel sheets,  $R_b$  ( $\Omega$ ) is the bulk resistance (intercept at  $Z'$  axis), and  $S$  is the contact area ( $\text{cm}^2$ ) between electrolyte and stainless steel sheets. The total conductivity ( $\sigma$ ) of the hydrogel electrolyte is calculated to be  $12.2 \text{ mS cm}^{-1}$ . Electronic conductivity of the hydrogel electrolyte was determined by the direct current (DC) polarization method under an applied DC voltage of 10 mV, which is on the order of  $10^{-5} \text{ S cm}^{-1}$ , thus the electronic conductivity can be ignored, and the ionic conductivity of the hydrogel electrolyte can be determined to be  $12.2 \text{ mS cm}^{-1}$ .

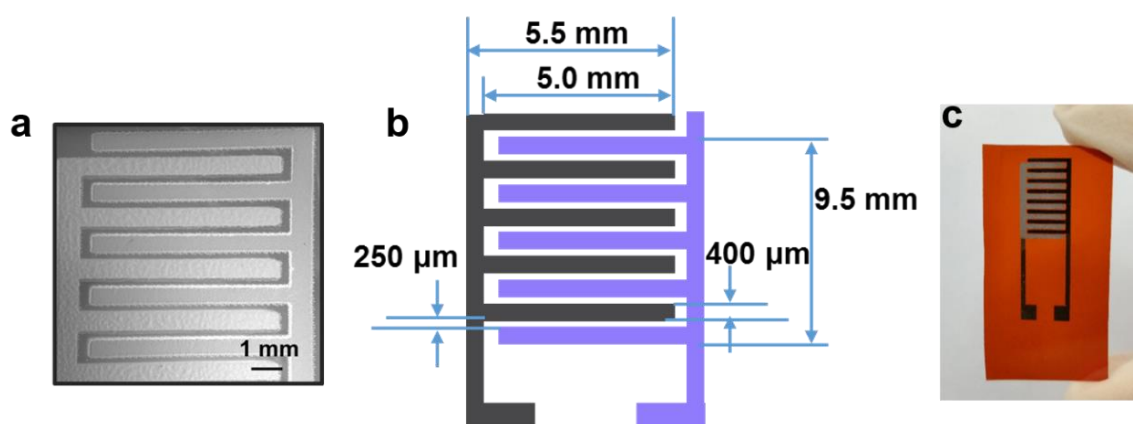

**Fig. S11** (a) SEM image, (b) dimensions and (c) optical image of the screen-printed interdigital electrodes

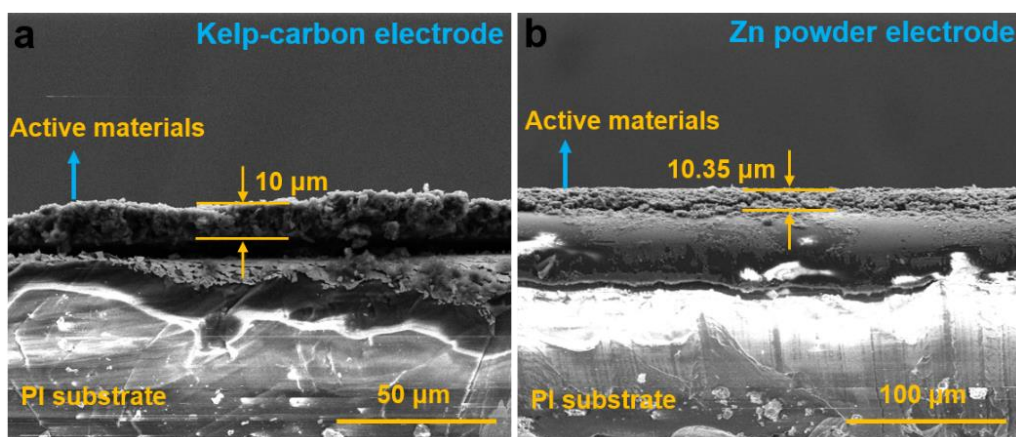

**Fig. S12** SEM images on the cross-section of the interdigital electrodes after screen printing (printing one layer): (a) kelp-carbon cathode and (b) Zn powder anode. The gap between the electrode film and the substrate is caused by the mechanical cutting during SEM sample preparation.

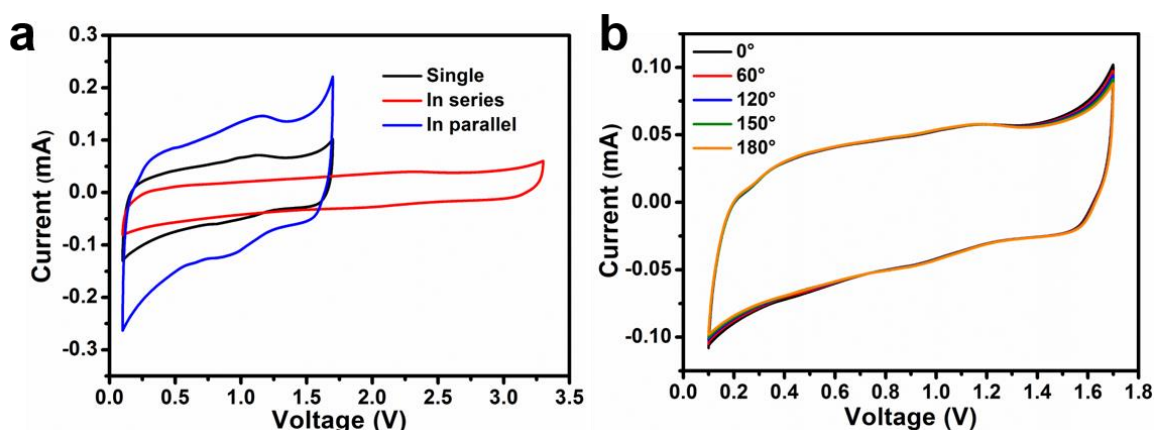

**Fig. S13** (a) CV curves at  $10 \text{ mV s}^{-1}$  of a single micro-ZHC, and two cells connected in series or parallel. (b) CV curves at  $10 \text{ mV s}^{-1}$  of a single micro-ZHC at different bending angles

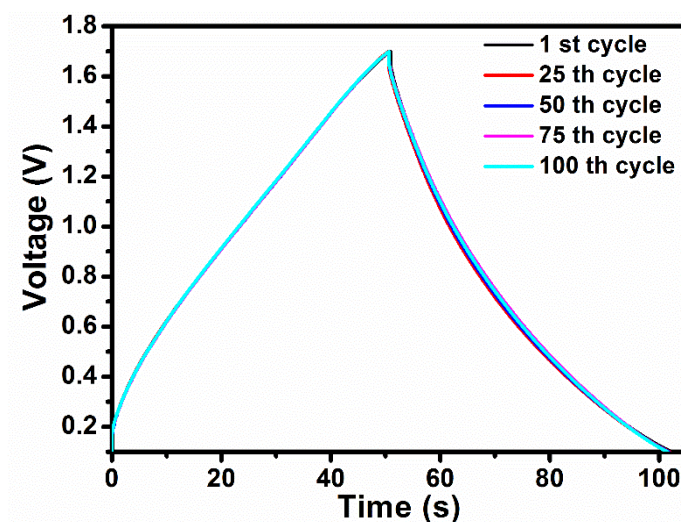

**Fig. S14** Typical GCD curves of the micro-ZHC at a bending angle of  $120^\circ$  for 100 cycles

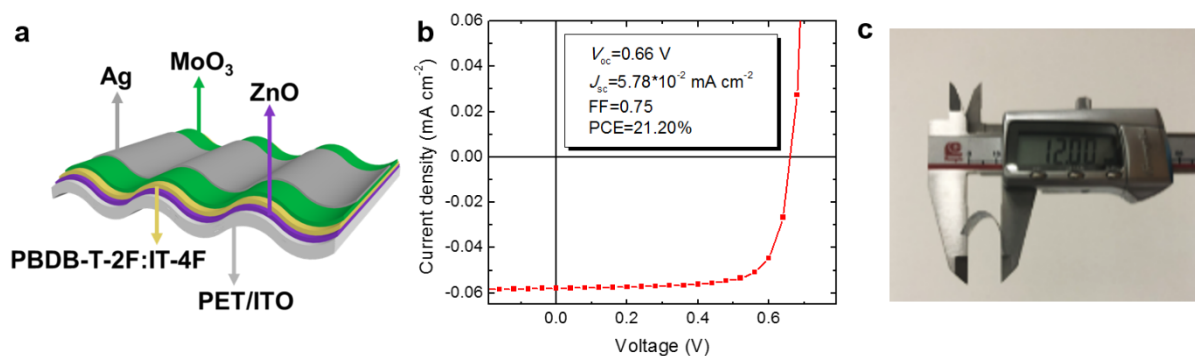

**Fig. S15** (a) Device structure of the flexible organic solar cell. (b)  $J$ - $V$  characteristic of the flexible organic solar cell at a light intensity of  $0.135 \text{ mW cm}^{-2}$  ( $V_{oc}$ : open-circuit voltage,  $J_{sc}$ : short-circuit current density, FF: fill factor, PCE: power conversion efficiency). (c) Flexibility of the organic solar cell.

PCE is calculated as follows (power input,  $P_{in} = 0.135 \text{ mW cm}^{-2}$ ):

$$\begin{aligned} \text{PCE} &= \frac{V_{oc} * J_{sc} * \text{FF}}{P_{in}} \\ &= \frac{0.66 \text{ V} * 5.78 * 10^{-2} \text{ mA cm}^{-2} * 0.75}{0.135 \text{ mW cm}^{-2}} \\ &= 21.2\% \end{aligned}$$

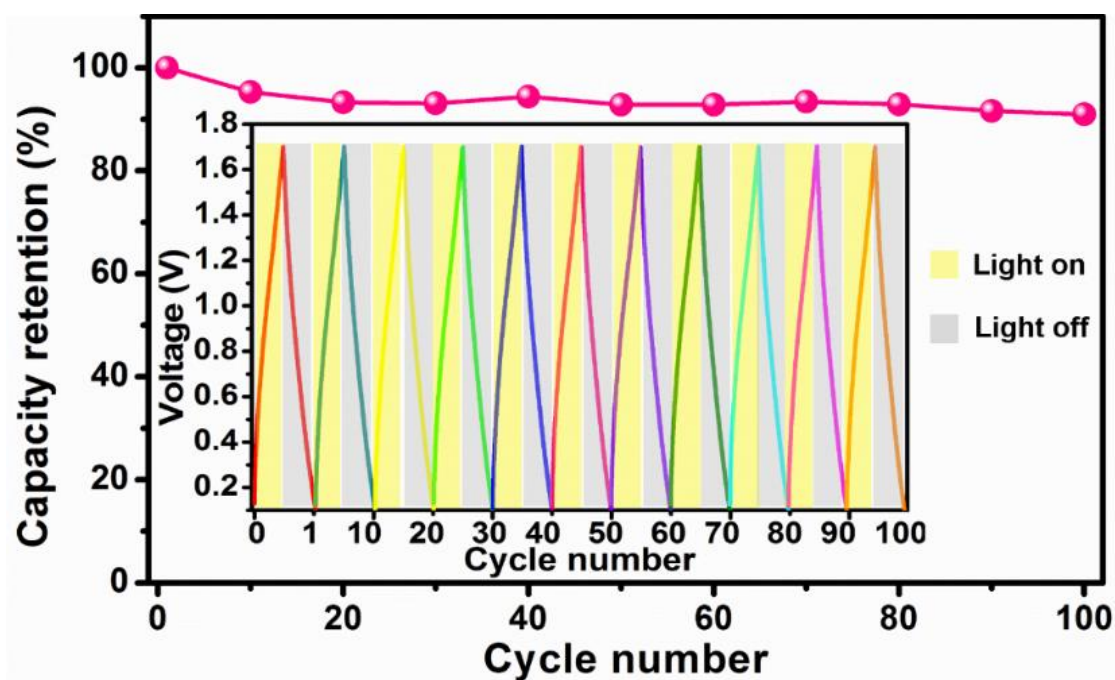

**Fig. S16** Cycling stability of the integrated unit at a solar-charging intensity of  $4.14 \text{ mW cm}^{-2}$  and discharge current density of  $2 \text{ mA cm}^{-2}$

**Table S1** Specific capacities/capacitances and energy/power densities of the ZHC and Micro-ZHC based on different metrics (including gravimetric, areal and volumetric performances)

|                        |                                  |                                  |                                |                                  |                                 |                                  |                                 |
|------------------------|----------------------------------|----------------------------------|--------------------------------|----------------------------------|---------------------------------|----------------------------------|---------------------------------|
| ZHC <sup>a</sup>       | $C_m$<br>(mAh g <sup>-1</sup> )  | $C_m'$<br>(F g <sup>-1</sup> )   | $C_v$<br>(F cm <sup>-3</sup> ) | $E$<br>(Wh kg <sup>-1</sup> )    | $P$<br>(W kg <sup>-1</sup> )    | $E_v$<br>(Wh L <sup>-1</sup> )   | $P_v$<br>(W L <sup>-1</sup> )   |
|                        | 196.7                            | 445                              | 284.8                          | 111.5                            | 1300                            | 71.36                            | 832                             |
| Micro-ZHC <sup>b</sup> | $C_A$<br>(μAh cm <sup>-2</sup> ) | $C_A'$<br>(mF cm <sup>-2</sup> ) | $C_v$<br>(F cm <sup>-3</sup> ) | $E_A$<br>(μWh cm <sup>-2</sup> ) | $P_A$<br>(μW cm <sup>-2</sup> ) | $E_v$<br>(mWh cm <sup>-3</sup> ) | $P_v$<br>(mW cm <sup>-3</sup> ) |
|                        | 10.28                            | 23.1                             | 19.7                           | 8.2                              | 40                              | 6.98                             | 34                              |

<sup>a</sup>The gravimetric performance of ZHC is calculated based on the mass of the cathode active material; the volumetric performance of ZHC is calculated based on the cathode volume.

<sup>b</sup>The areal performance of micro-ZHC is calculated based on the total area of the cathode and anode; the volumetric performance of micro-ZHC is calculated based on the total volume of the cathode and anode.

**Table S2** Photovoltaic parameters of the single flexible OSC under different light sources ( $P_{in}$ : power input;  $V_{oc}$ : open-circuit voltage;  $J_{sc}$ : short-circuit current density, FF: fill factor;  $P_{out}$ : power output; PCE: power conversion efficiency)

| Light source | $P_{in}$ (mW cm <sup>-2</sup> ) | $V_{oc}$ (V) | $J_{sc}$ (mA cm <sup>-2</sup> ) | FF   | $P_{out}$ (mW cm <sup>-2</sup> ) | PCE (%) |
|--------------|---------------------------------|--------------|---------------------------------|------|----------------------------------|---------|
| AM 1.5G      | 100                             | 0.83         | 18.51                           | 0.69 | 10.6                             | 10.6    |
| LED          | 0.135                           | 0.66         | 0.058                           | 0.75 | 0.029                            | 21.2    |
